# Supplementary material for: Stability of monometallic Pt and Ru supported on hierarchical HZSM-5 nanosheets for hydrodeoxygenation of lignin-derived compounds in the aqueous phase
Source: Royal Society of Chemistry journal article supplement (doi:10.1039/c9se00773c), 2019-11-06
Supplement: c9se00773c1.pdf [file c9se00773c1.pdf]

## Supplementary Information

### **Stability of monometallic Pt and Ru supported on hierarchical HZSM-5 nanosheets for hydrodeoxygenation of lignin-derived compounds in aqueous-phase**

Saros Salakhum, Kachaporn Saenluang and Chularat Wattanakit\*

*Department of Chemical and Biomolecular Engineering, School of Energy  
Science and Engineering, and Nanocatalysts and Nanomaterials for Sustainable  
Energy and Environment Research Network of NANOTEC, Vidyasirimedhi  
Institute of Science and Technology, Rayong, 21210, Thailand*

\*Corresponding author: Email; [chularat.w@vistec.ac.th](mailto:chularat.w@vistec.ac.th)

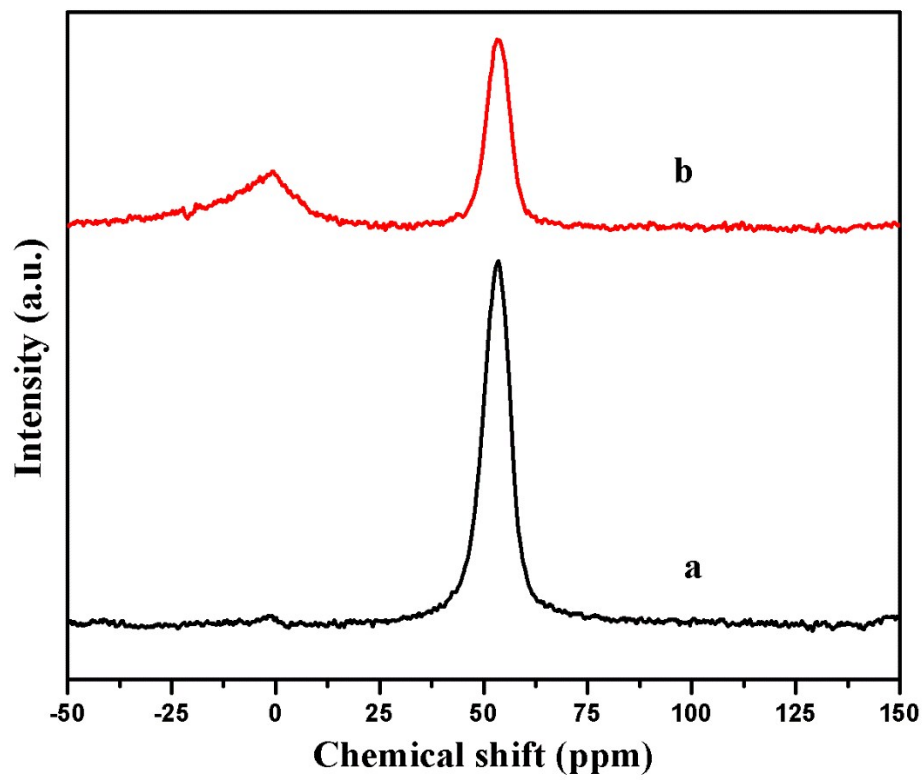

**Figure S1.**  $^{27}\text{Al}$  NMR spectra of (a) HZSM-5-CON, and (b) HZSM-5-NS.

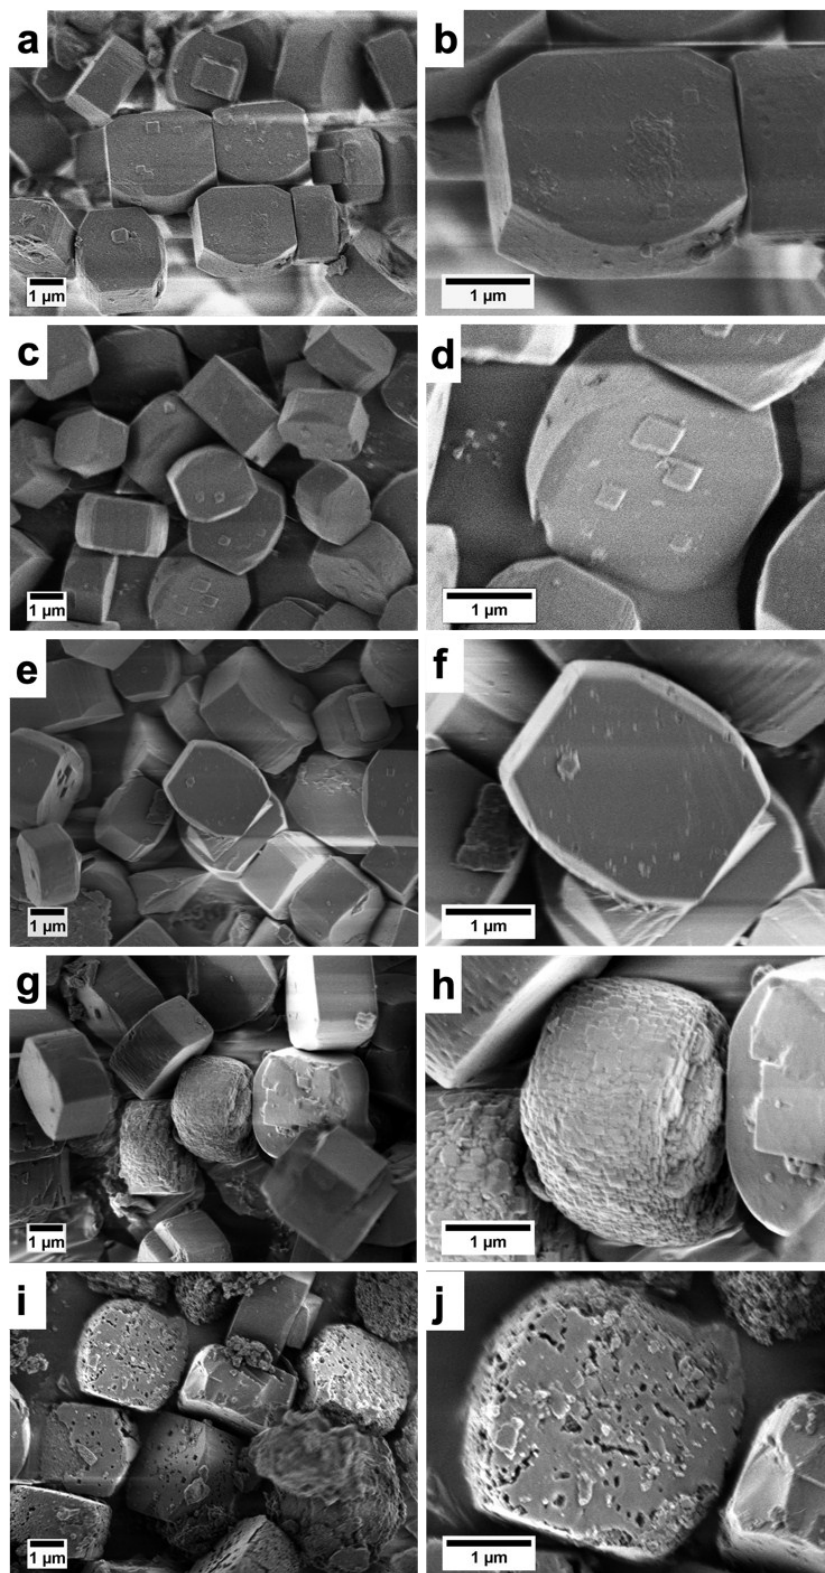

**Figure S2.** SEM images of Pt/HZSM5-CON of (a-b) fresh Pt/HZSM5-CON, (c-d) treated at 50 °C, (e-f) treated at 100 °C, (g-h) treated at 150 °C, and (i-j) treated at 200 °C in hot liquid water.

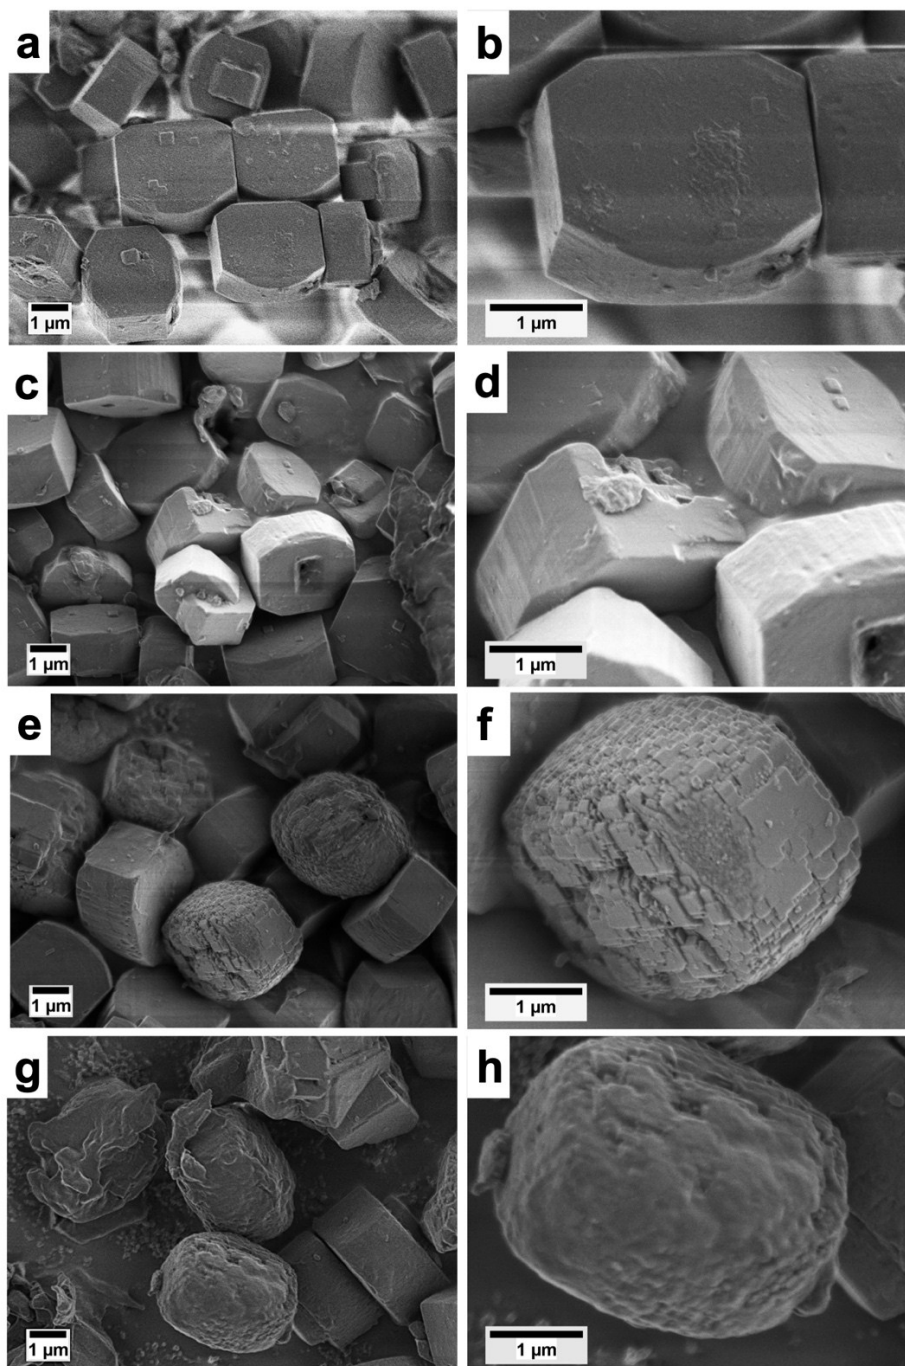

**Figure S3.** SEM images of Pt/HZSM5-CON of (a-b) fresh Pt/HZSM5-CON, (c-d) treated at 0.5 MPa, (e-f) treated at 1 MPa, (g-h) treated at 2 MPa with N<sub>2</sub> pressurized gas in water.

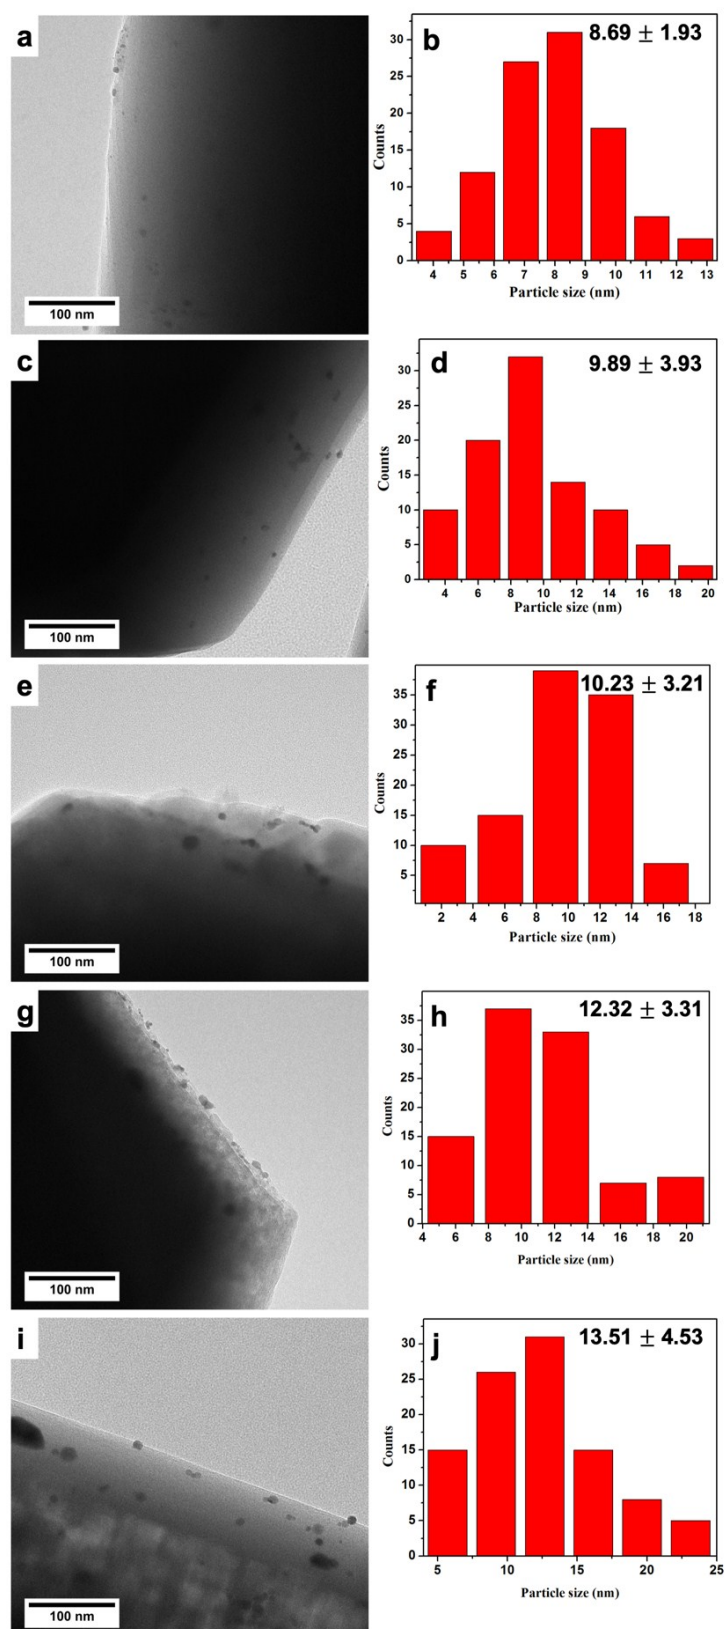

**Figure S4.** TEM images and particle size distribution of Pt/HZSM5-CON of (a-b) fresh Pt/HZSM5-CON, (c-d) treated at 50 °C, (e-f) treated at 100 °C, (g-h) treated at 150 °C, and (i-j) 200 °C.

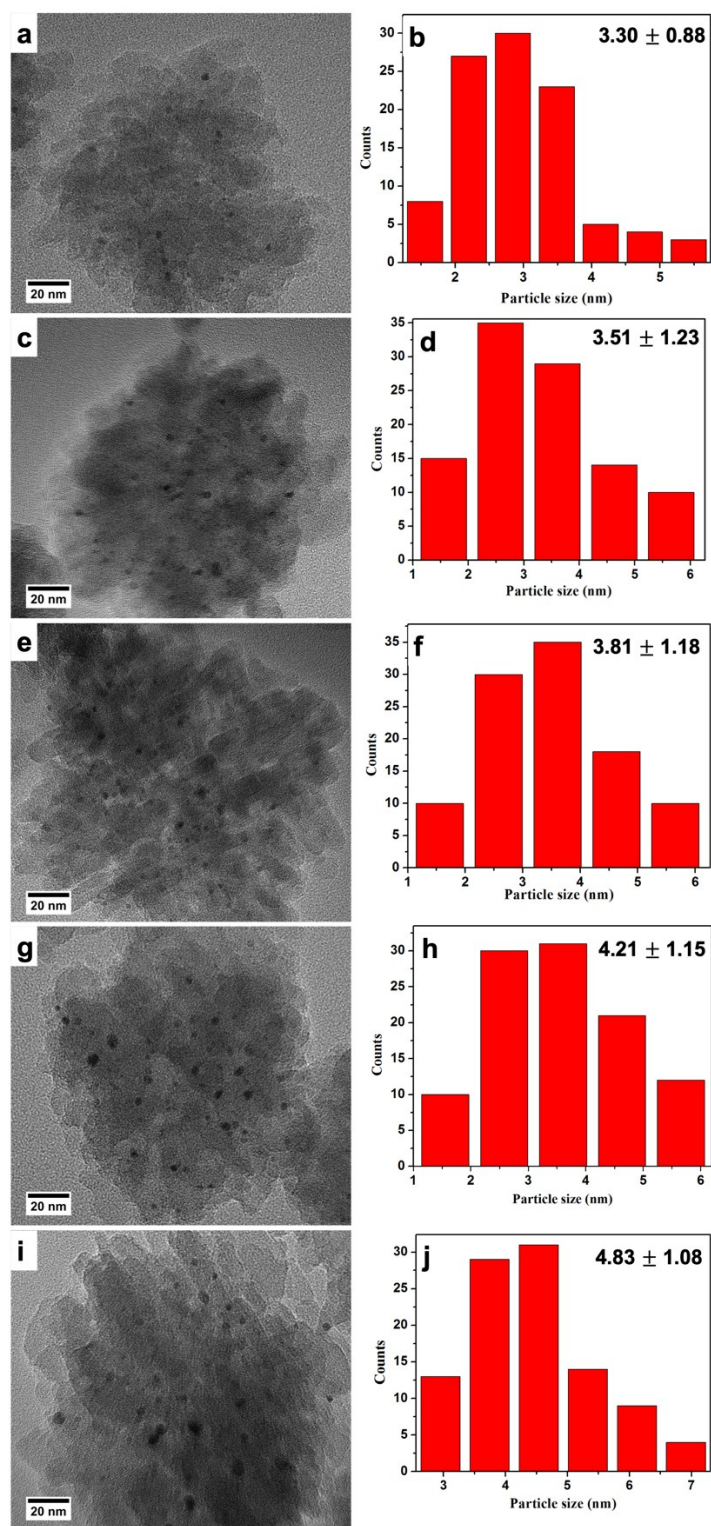

**Figure S5.** TEM images and particle size distribution of Pt/HZSM5-NS of (a-b) fresh Pt/HZSM5-NS, (c-d) treated at 50 °C, (e-f) treated at 100 °C, (g-h) treated at 150 °C, and (i-j) 200 °C.



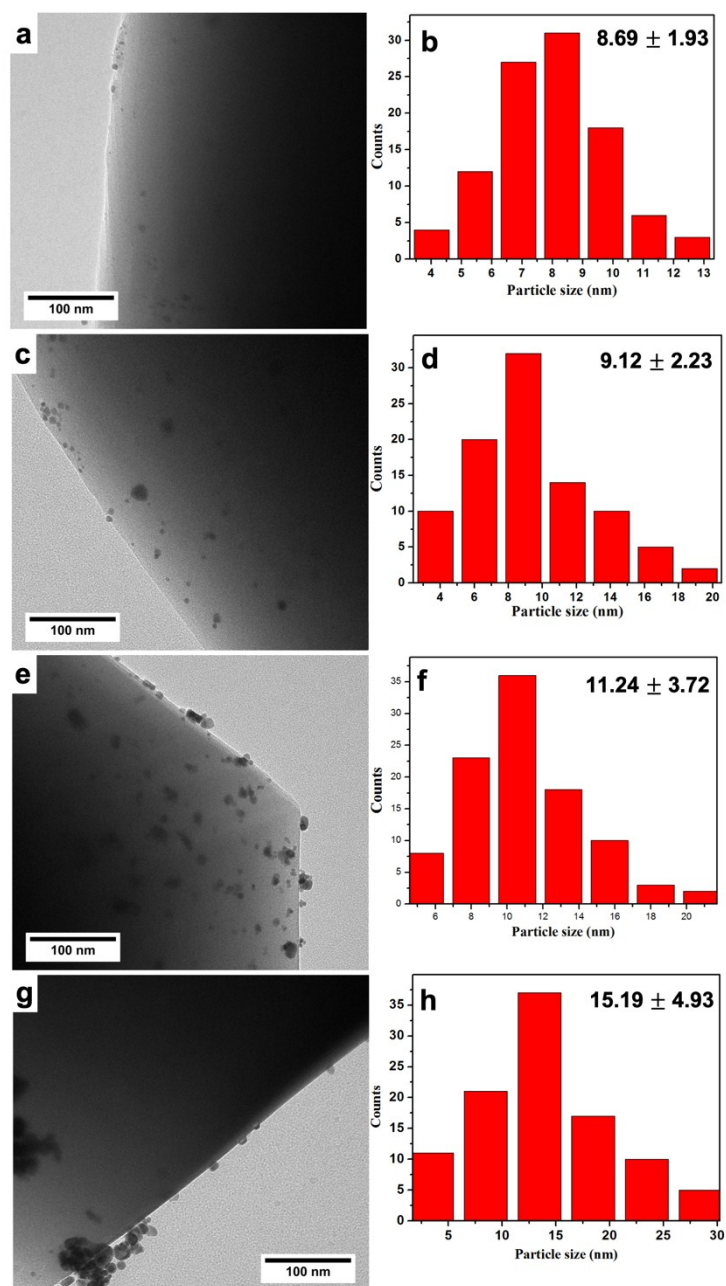

**Figure S6.** TEM images and particle size distribution of Pt/HZSM5-CON of (a-b) fresh Pt/HZSM5-CON, (c-d) treated at 0.5 MPa, (e-f) treated at 1 MPa, (g-h) treated at 2 MPa.

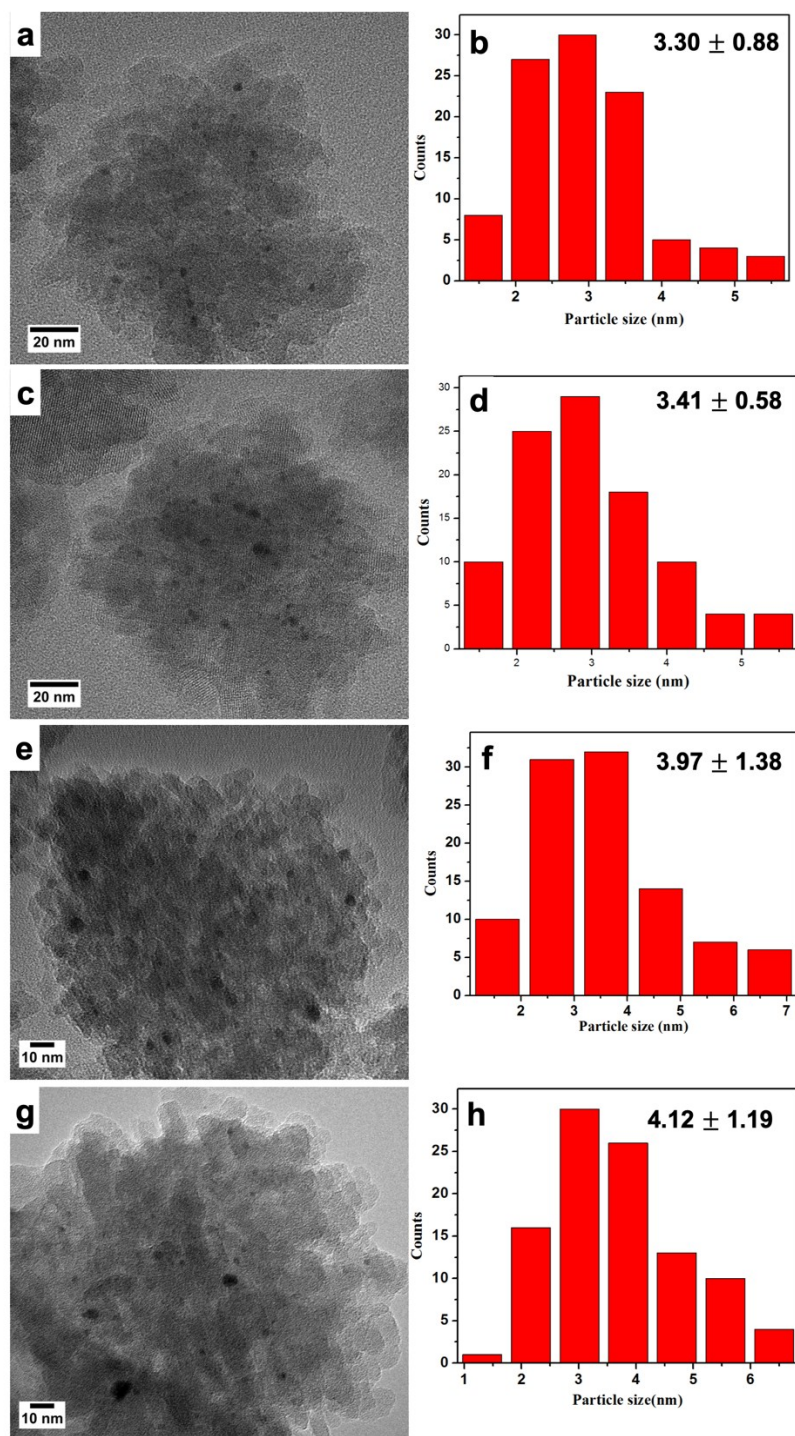

**Figure S7.** TEM images and particle size distribution of Pt/HZSM5-NS of (a-b) fresh Pt/HZSM5-NS, (c-d) treated at 0.5 MPa, (e-f) treated at 1 MPa, (g-h) treated at 2 MPa.



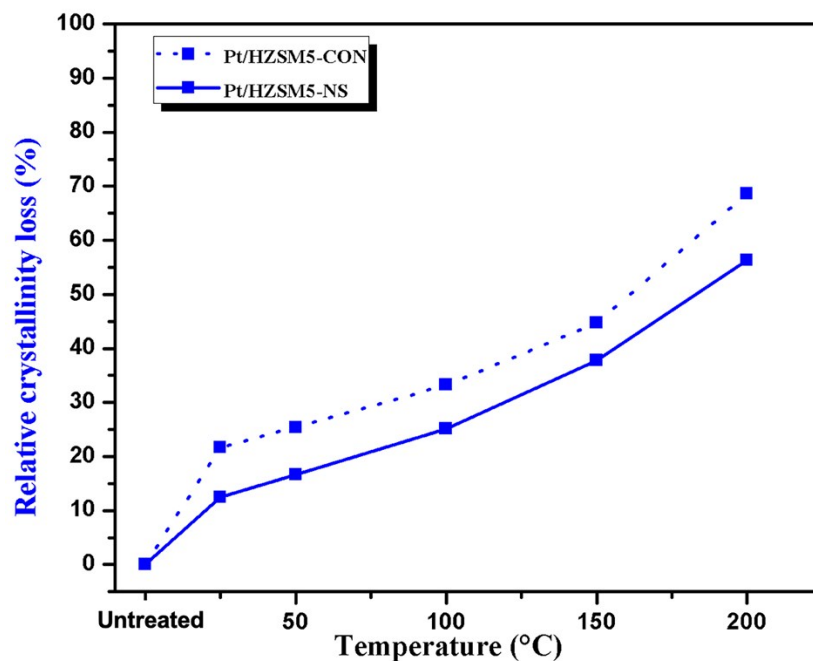

**Figure S8.** The effect of treated temperature on the relative crystallinity-loss obtained at the same total pressure of 1.5 MPa (including autogenous pressure) over Pt/HZSM5-CON and Pt/HZSM5-NS. Testing condition: a 0.15 g of dried catalyst, and a 10 ml of DI water at 1.5 MPa for 12 h.

**Table S1.** Textural data obtained from N<sub>2</sub> adsorption measurement of all as-synthesized samples.

| Samples         | Si/Al <sup>a</sup> | Pt or Ru <sup>b</sup> | S <sub>BET</sub> <sup>c</sup> | S <sub>micro</sub> <sup>d</sup> | S <sub>ext</sub> <sup>e</sup> | V <sub>total</sub> <sup>f</sup> | V <sub>micro</sub> <sup>g</sup> | V <sub>ext</sub> <sup>h</sup> |
|-----------------|--------------------|-----------------------|-------------------------------|---------------------------------|-------------------------------|---------------------------------|---------------------------------|-------------------------------|
| 0.5Pt/HZSM5-CON | 68                 | 0.50                  | 372.5                         | 350.0                           | 22.5                          | 0.21                            | 0.13                            | 0.09                          |
| 0.5Ru/HZSM5-CON | 68                 | 0.49                  | 374.3                         | 354.2                           | 20.1                          | 0.22                            | 0.13                            | 0.09                          |
| 0.5Pt/HZSM5-NS  | 70                 | 0.50                  | 391.5                         | 278.5                           | 112.5                         | 0.67                            | 0.12                            | 0.55                          |
| 0.5Ru/HZSM5-NS  | 70                 | 0.50                  | 389.2                         | 289.1                           | 100.1                         | 0.64                            | 0.12                            | 0.52                          |

<sup>a</sup>Si/Al obtained by WDXRF; <sup>b</sup>Pt content reported in % weight obtained by WDXRF. <sup>c</sup>S<sub>BET</sub>: BET specific surface area; <sup>d</sup>S<sub>micro</sub>: micropore surface area; <sup>e</sup>S<sub>ext</sub>: external surface area; <sup>f</sup>V<sub>total</sub>: total pore volume obtained at P/P<sub>0</sub>=0.99; <sup>g</sup>V<sub>micro</sub>: micropore volume; <sup>h</sup>V<sub>ext</sub>: external pore volume; All surface areas and pore volumes are in the units of m<sup>2</sup>/g and cm<sup>3</sup>/g, respectively.

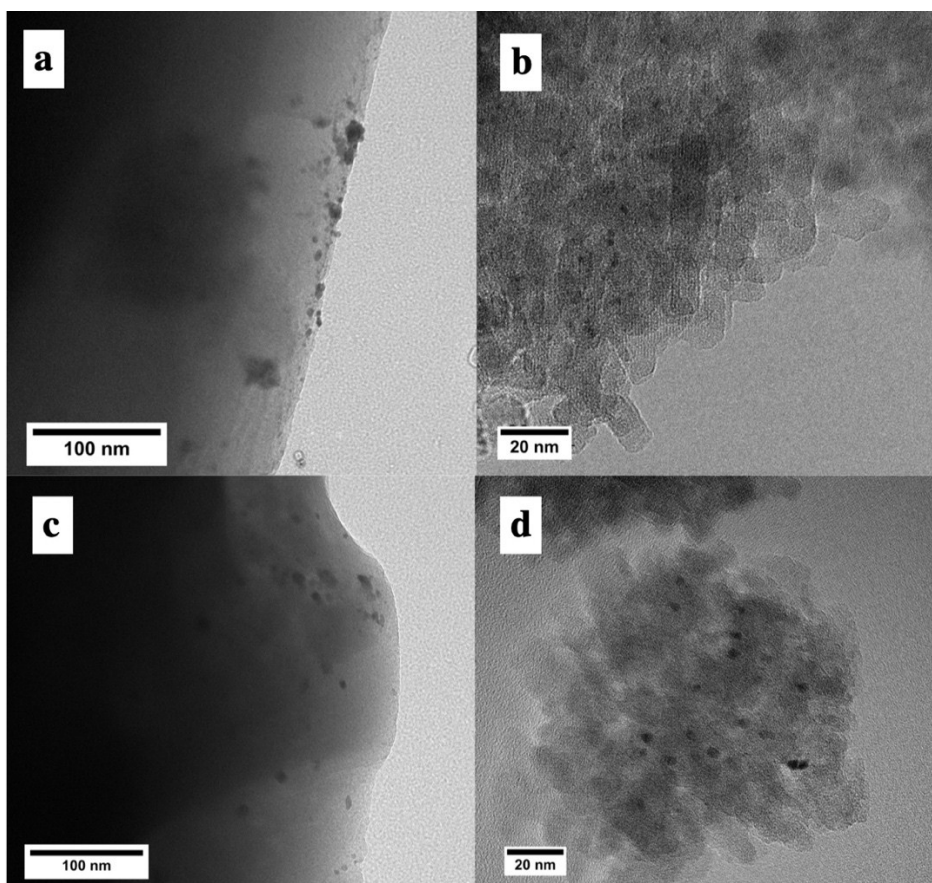

**Figure S9.** TEM images of (a) fresh Pt/HZSM5-CON, (b) fresh Pt/HZSM5-NS, (c) Pt/HZSM5-CON after reaction, and (d) Pt/HZSM5-NS after reaction.

**Table S2.** Catalytic performance in the HDO of 4-propylphenol over Pt supported

| No. of runs | Conversion (%) | Selectivity (%)    |                    |                |                     |                      |
|-------------|----------------|--------------------|--------------------|----------------|---------------------|----------------------|
|             |                | Propyl cyclohexane | Propyl cyclohexene | Propyl benzene | Propyl cyclohexanol | Propyl cyclohexanone |
| 1           | 99.11          | 32.16              | 0                  | 4.40           | 63.44               | 0                    |
| 2           | 82.12          | 28.29              | 0                  | 3.54           | 56.05               | 12.12                |

on hierarchical HZSM-5 nanosheets and the recyclability test.

Reaction conditions: 0.5 g of unreduced catalyst, 5 ml of water, and 0.5 mmol of 4-propylphenol at 110 °C, and 1 MPa of H<sub>2</sub> for 10 h.

$$4\text{-propylcyclohexanol conversion (\%)} = \left( \frac{\text{moles of } 4\text{-propylcyclohexanol}_{\text{initial}} - \text{moles of } 4\text{-propylcyclohexanol}_{\text{final}}}{\text{moles of } 4\text{-propylcyclohexanol}_{\text{initial}}} \right) \times 100$$

$$\text{Product selectivity}_i(\%) = \left( \frac{\text{mole of desired product}_i}{\text{total number of moles of all the quantified products}} \right) \times 100$$

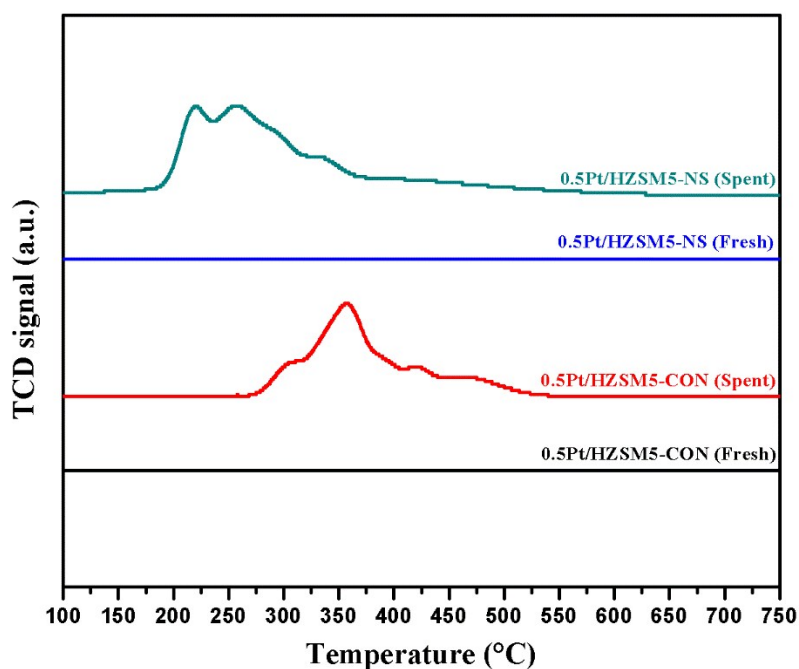

**Figure S10.** O<sub>2</sub>-TPO profiles of fresh and spent catalysts of 0.5wt% Pt supported on conventional and hierarchical HZSM-5 zeolites.

**Table S3.** Coke amount of spent 0.5Pt/HZSM5-CON and 0.5Pt/HZSM5-NS obtained from integrating the peak area of O<sub>2</sub>-TPO profiles

| Samples         | Coke amount (mmol.g <sup>-1</sup> ) |
|-----------------|-------------------------------------|
| 0.5Pt/HZSM5-CON | 0.197                               |
| 0.5Pt/HZSM5-NS  | 0.238                               |
